# Supplementary material for: Photochromic and molecular switching behaviour of new Schiff bases containing hydantoin rings: synthesis, characterization and crystal structures
Source: Royal Society of Chemistry journal article supplement (doi:10.1039/c8nj05748f), 2019-01-01
Supplement: c8nj05748f1.pdf [file c8nj05748f1.pdf]

## Photochromic and molecular switching behaviour of new Schiff base-containing hydantoin ring: Synthesis, characterization and crystal structure

Petar T. Todorov,<sup>a\*</sup> Petia N. Peneva,<sup>a</sup> Stela I. Georgieva,<sup>b</sup> Rusi I. Rusev,<sup>c</sup> Boris L. Shivachev,<sup>c</sup>  
Anton H. Georgiev,<sup>a</sup>

<sup>a</sup>Department of Organic Chemistry, University of Chemical Technology and Metallurgy, 1756 Sofia, Bulgaria, e-mail: pepi\_37@abv.bg

<sup>b</sup>Department of Analytical Chemistry, University of Chemical Technology and Metallurgy, 1756 Sofia, Bulgaria.

<sup>c</sup>Institute of Mineralogy and Crystallography, Bulgarian Academy of Sciences, Sofia 1113, Bulgaria.

### IR-spectrum

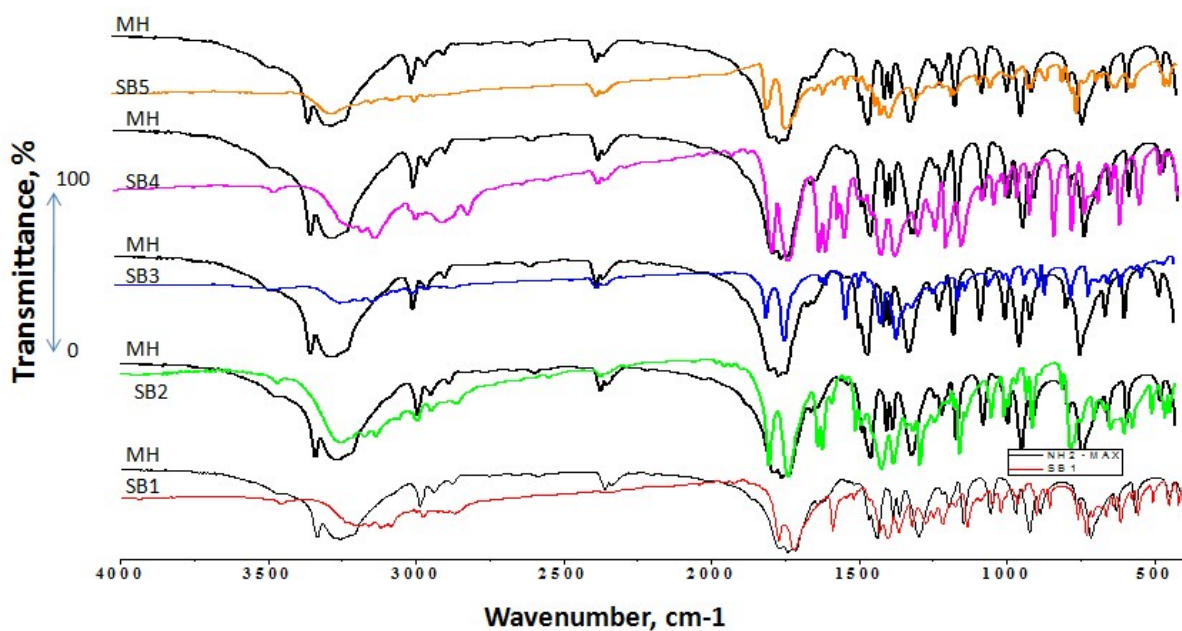

Fig.S1 IR-spectrum of synthesis 3-amino-5,5'-dimethylhydantoin Schiff bases (SB1, SB2, SB3, SB4 and SB5) and free ligand 3-amino-5,5'-dimethylhydantoin (MH).

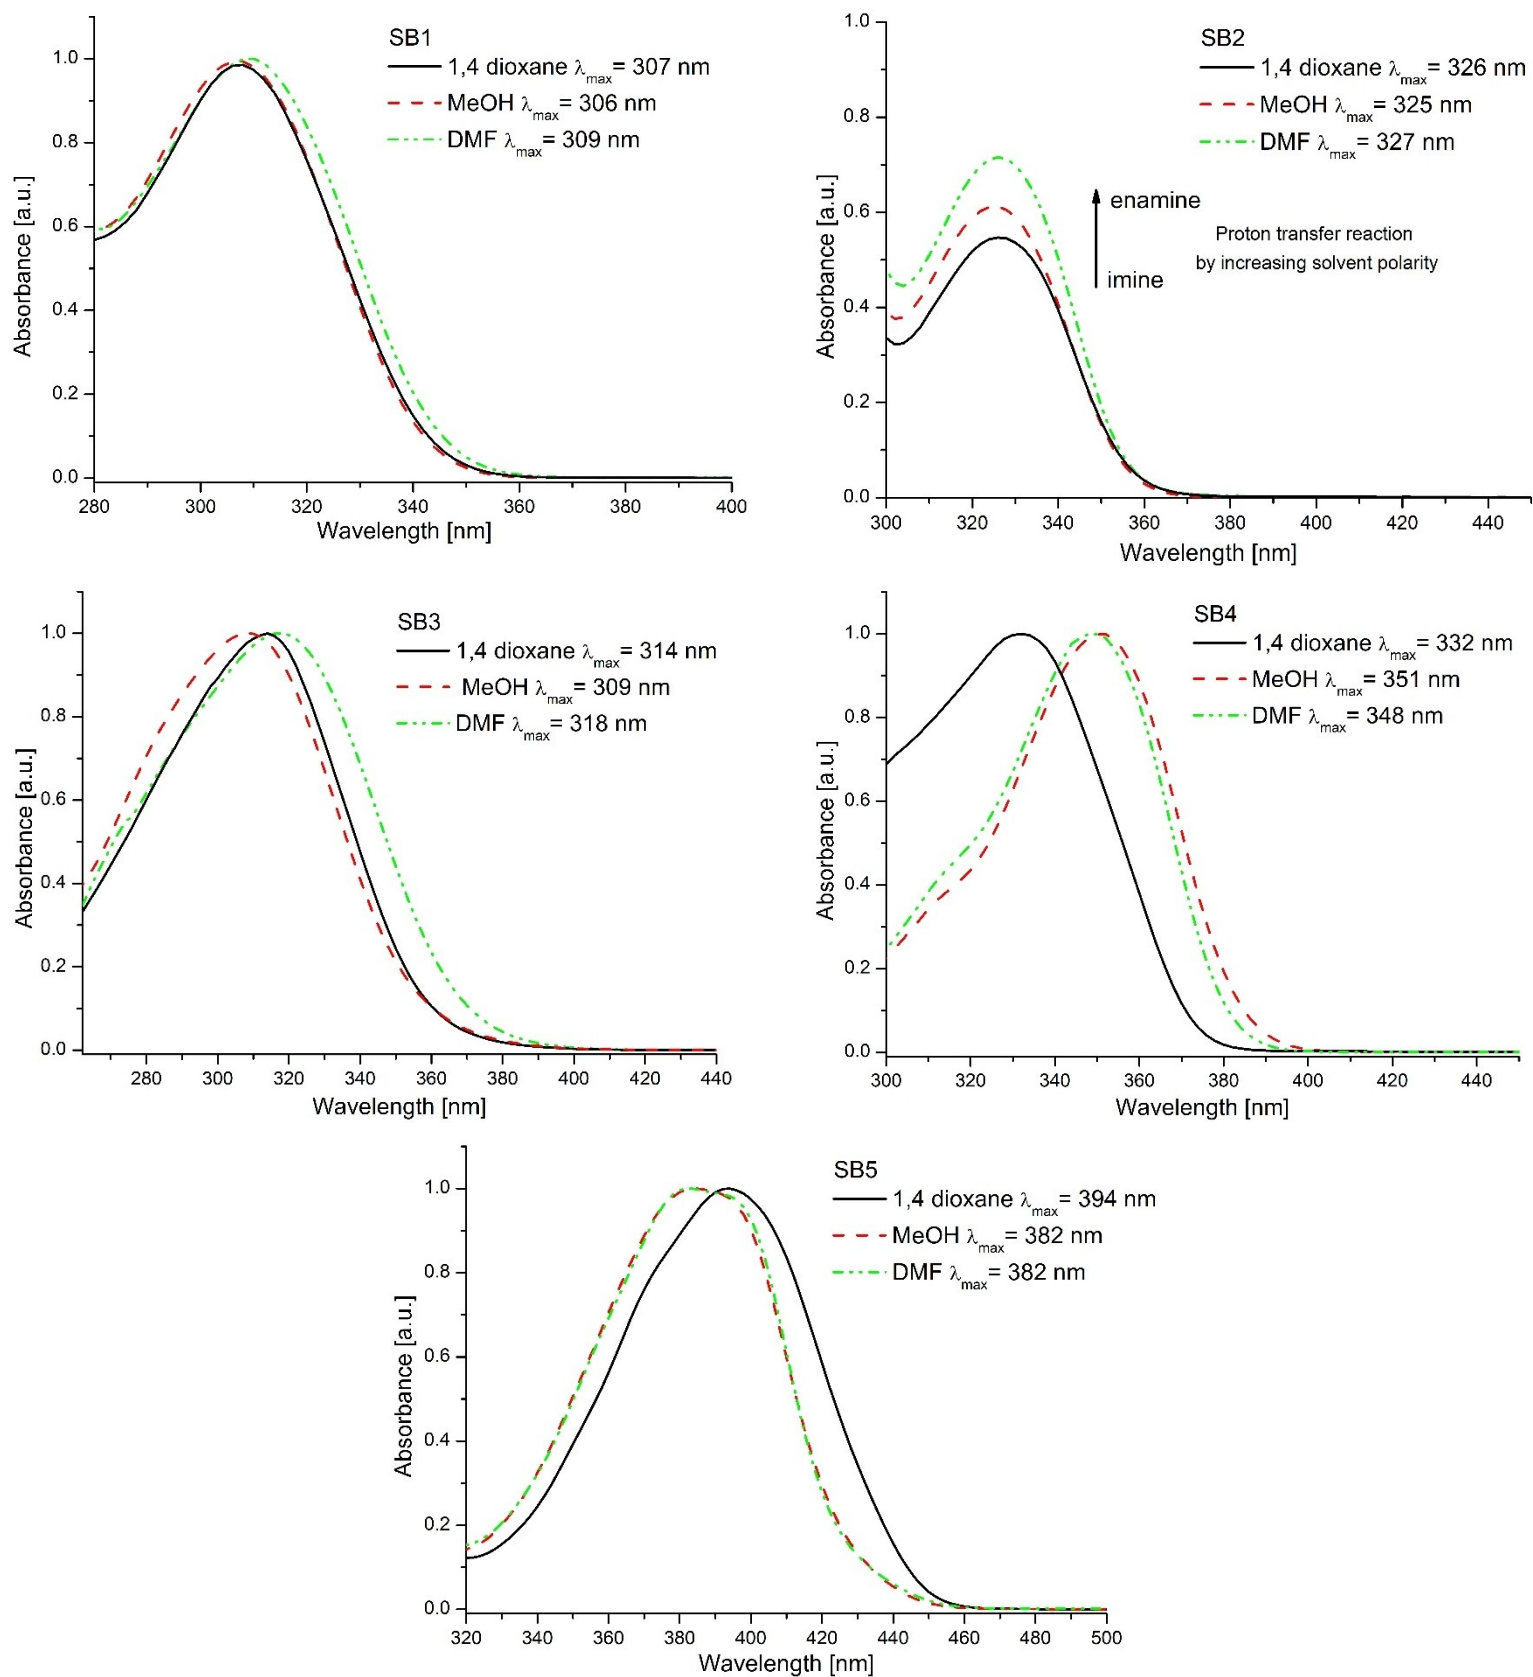

**Fig. S2** Normalized UV-VIS spectra of the SB's in 1,4-dioxane, MeOH and DMF solutions.

## Electrochemistry

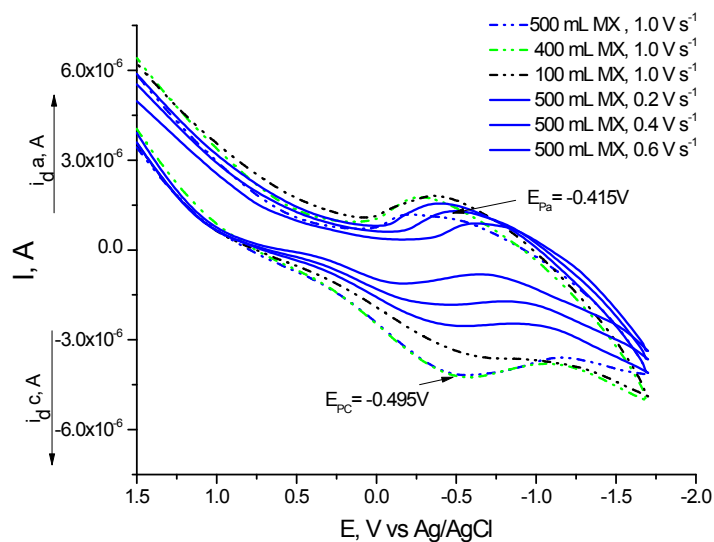

**Fig. S3** Cvs of free 3-amino-5,5'-dimethylhydantoin (MH) ( $0.0868 \text{ mol L}^{-1}$ ) at different volumes and scan rate.

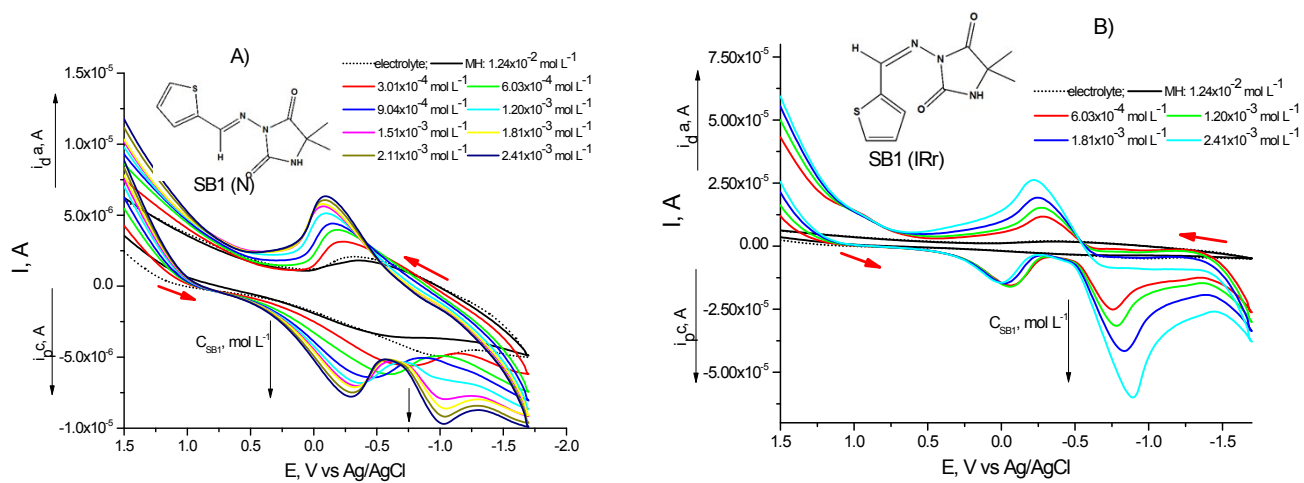

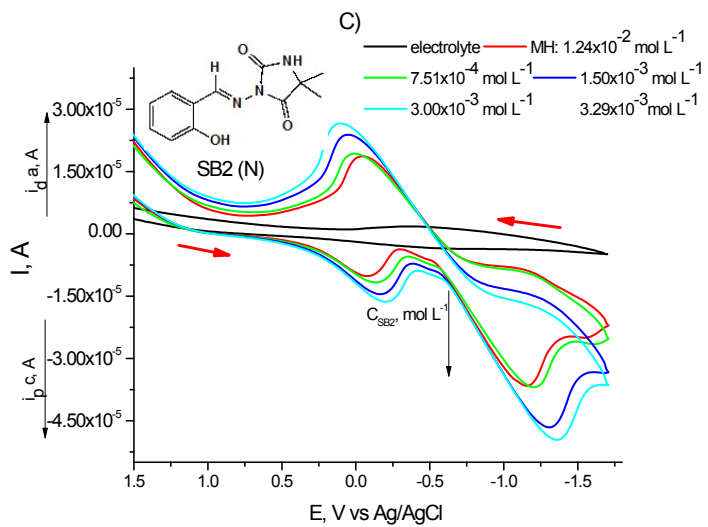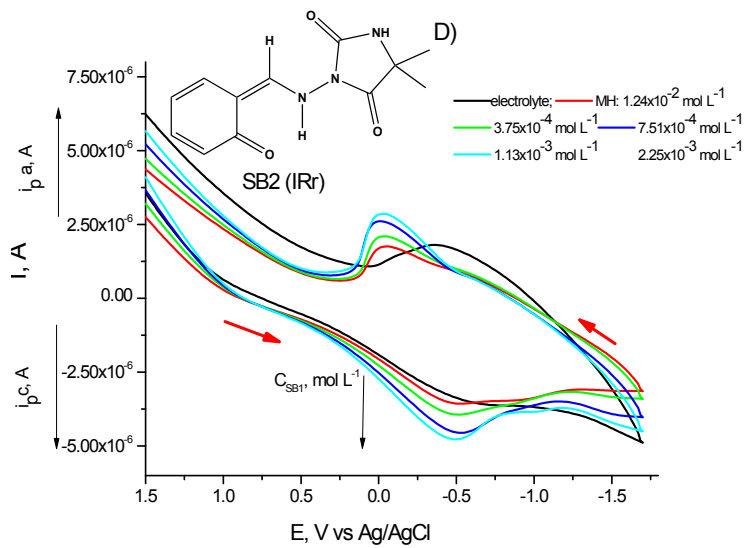

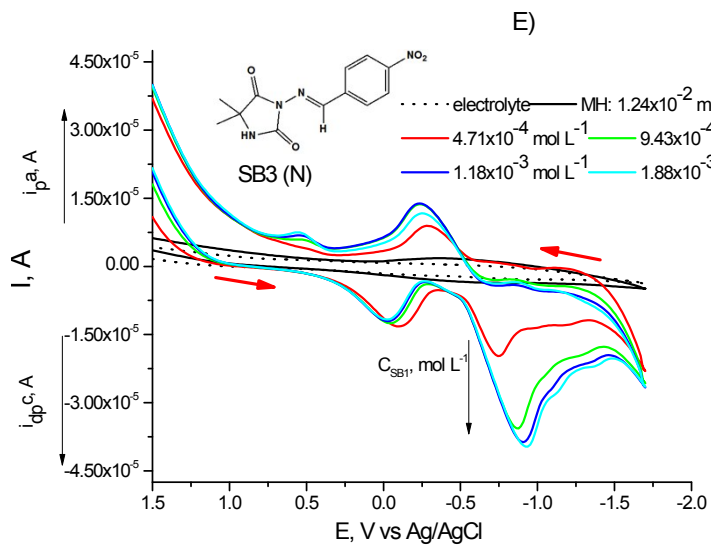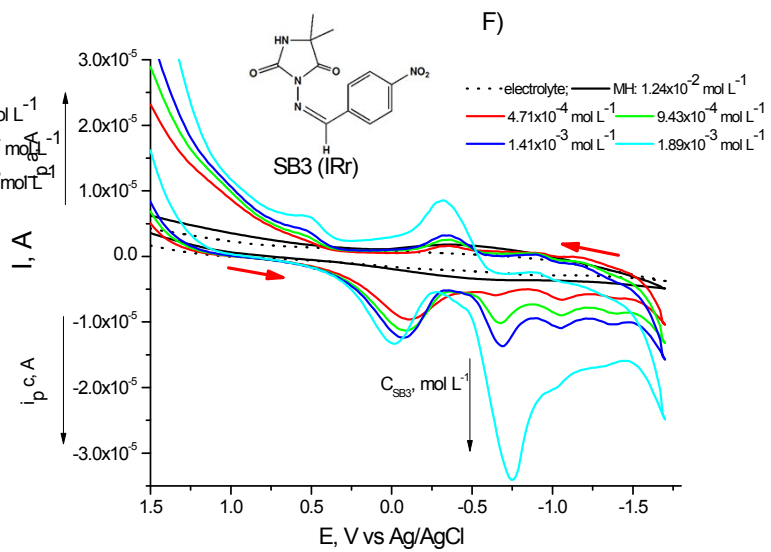

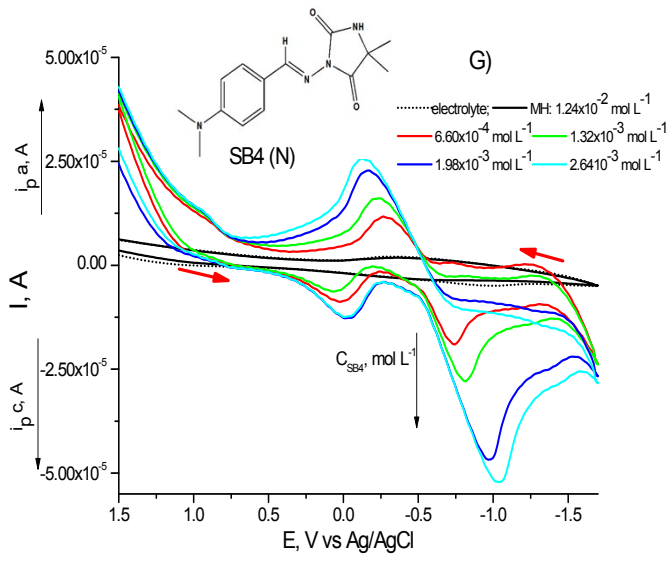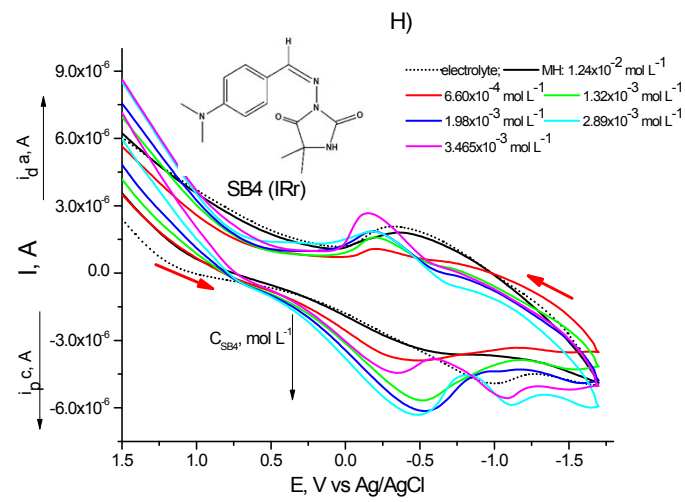

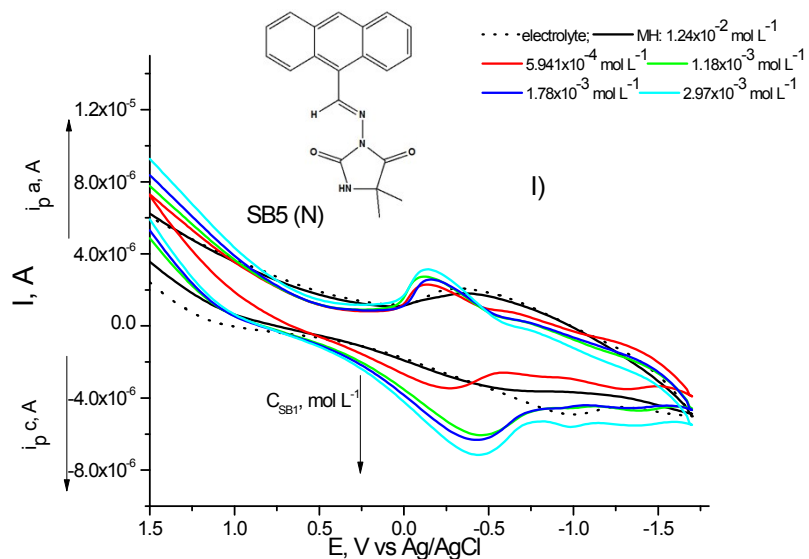

**Fig. S4** Cyclic voltammograms of 3-amino-5,5'-dimethylhydantoin Schiff bases from A) to I) before (SB(N)) and after (SB(IRr)) UV illumination with  $\lambda = 365 \text{ nm}$  at scan rate  $100 \text{ mV s}^{-1}$  and different concentrations.

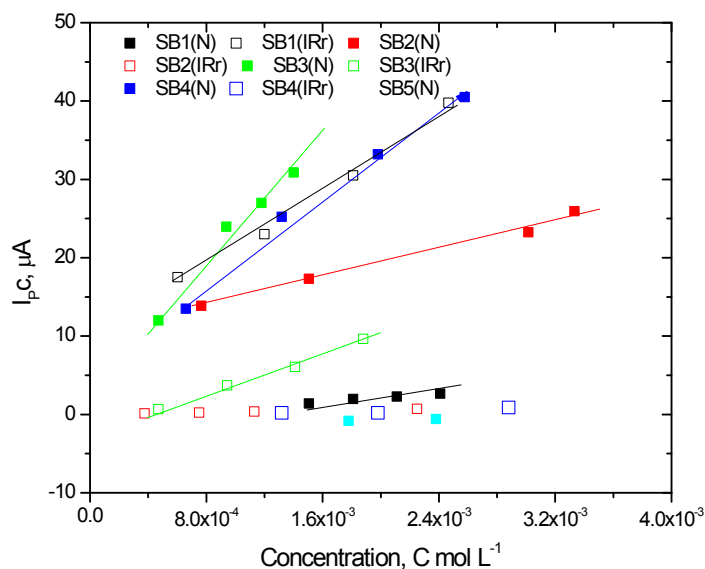

**Fig.S5** CVs of  $I_{pc}$  vs. different concentrations of 3-amino-5,5'-dimethylhydantoin Schiff bases before (SB(N)) and after (SB(IRr)) UV illumination with  $\lambda = 365 \text{ nm}$  and scan rate  $100 \text{ mV s}^{-1}$

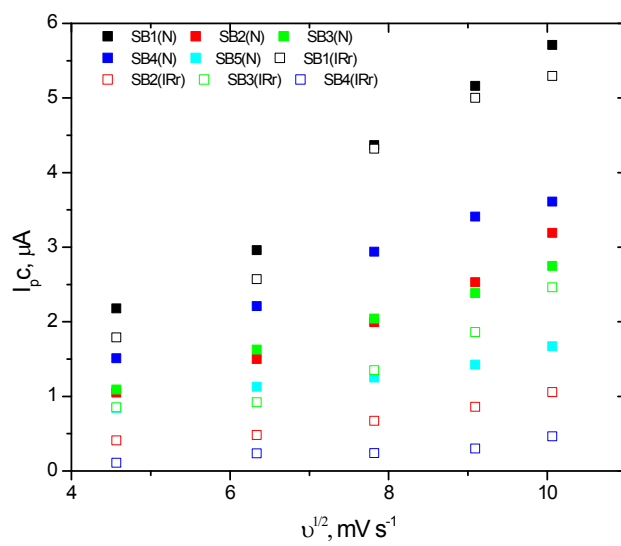

**Fig. S6** Plot of cathodic peak high,  $I_{pc}$   $\mu A$  vs. scan rate,  $v^{1/2}$   $mV s^{-1}$  in rang from 20 to 100  $mV s^{-1}$



# NMR-spectrum

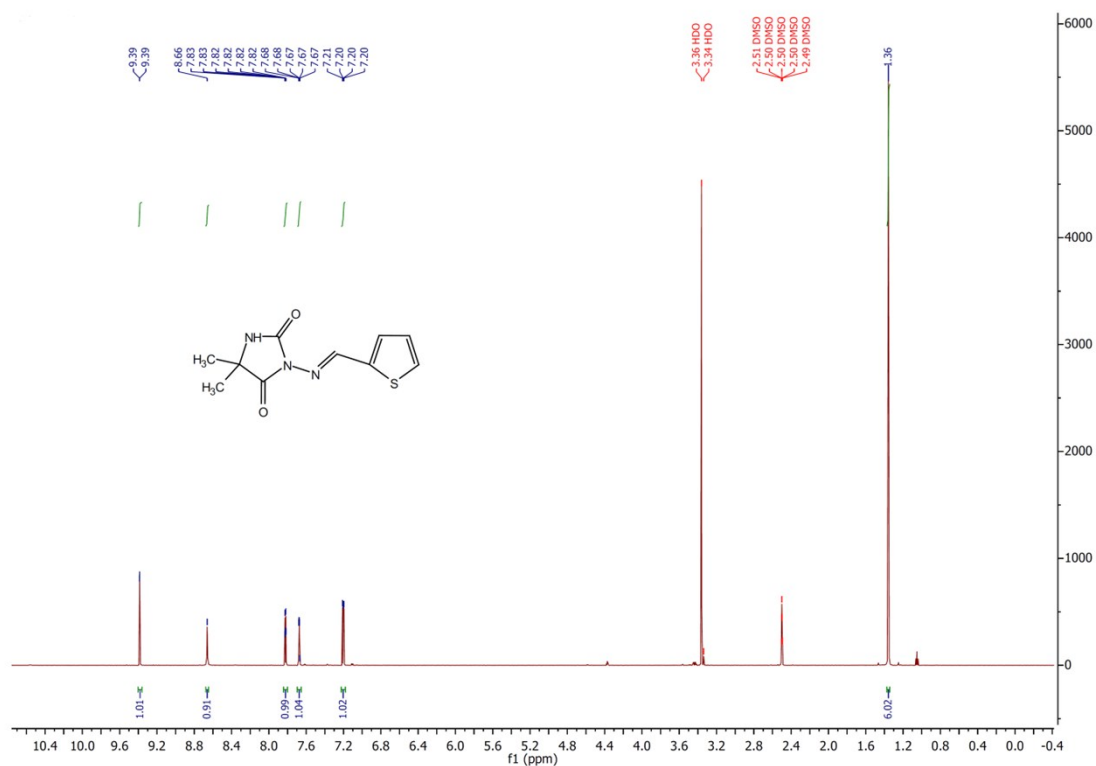

Fig. S7 <sup>1</sup>H NMR spectrum of SB1

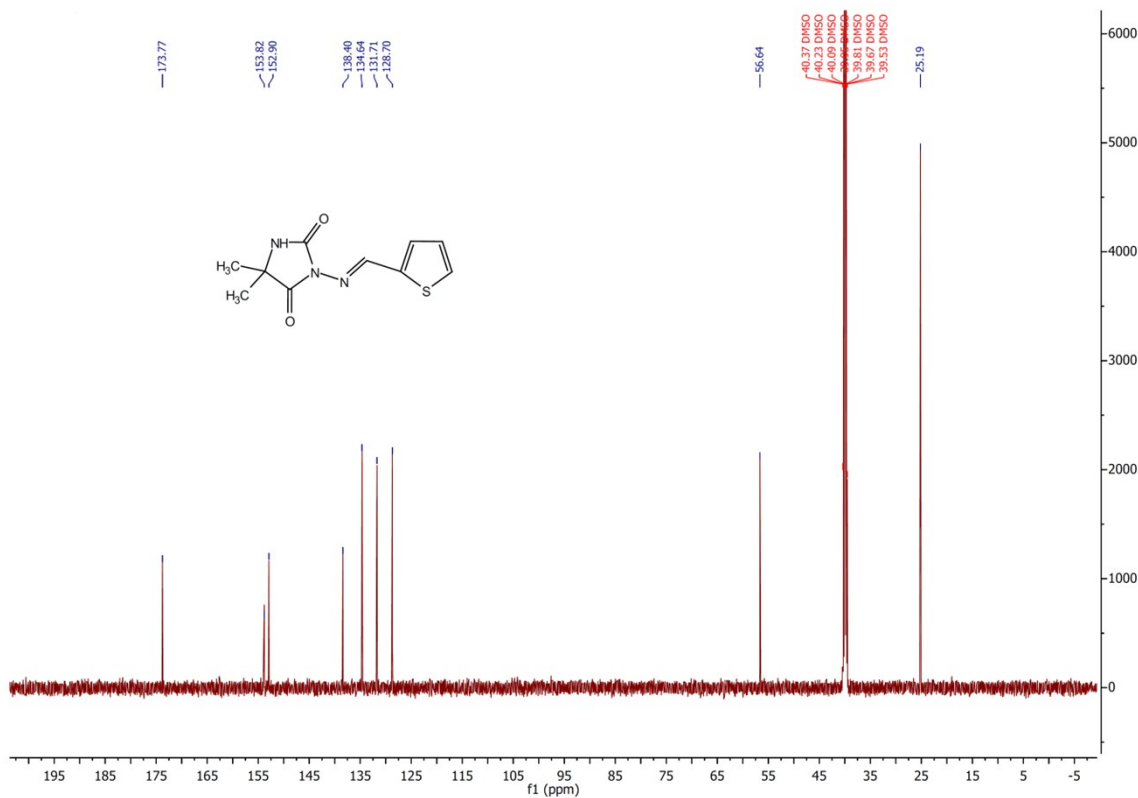

Fig. S8 <sup>13</sup>C NMR spectrum of SB1

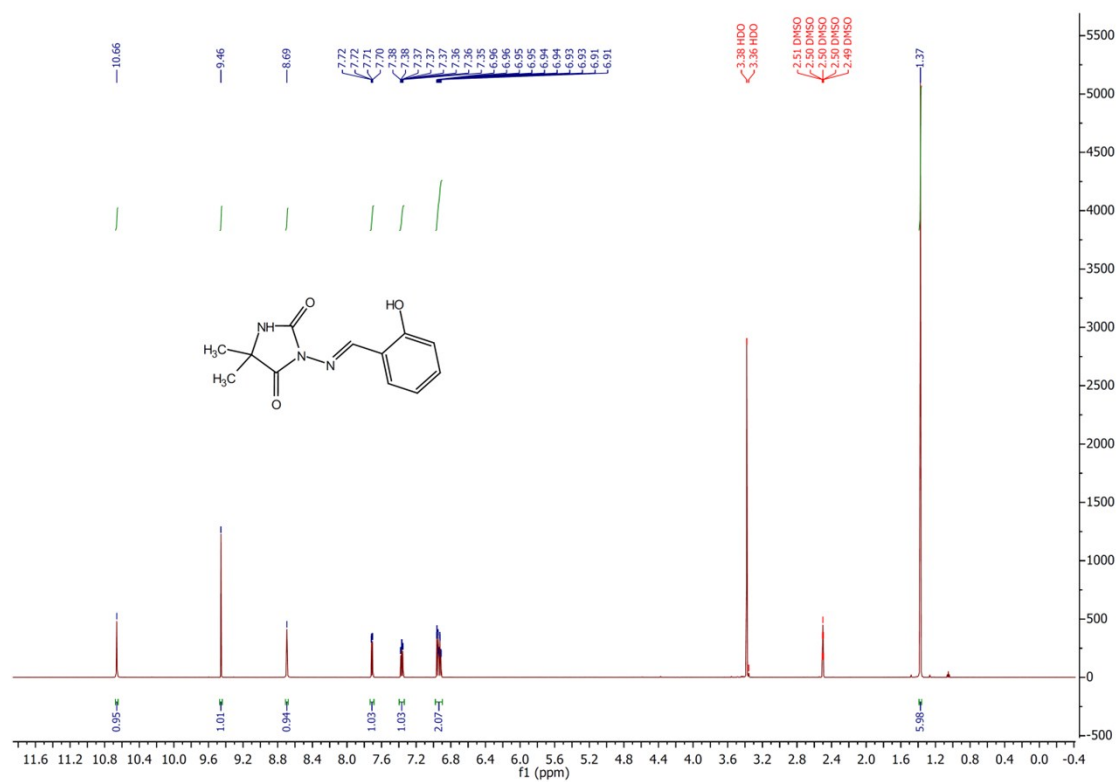

Fig. S9 <sup>1</sup>H NMR spectrum of SB2

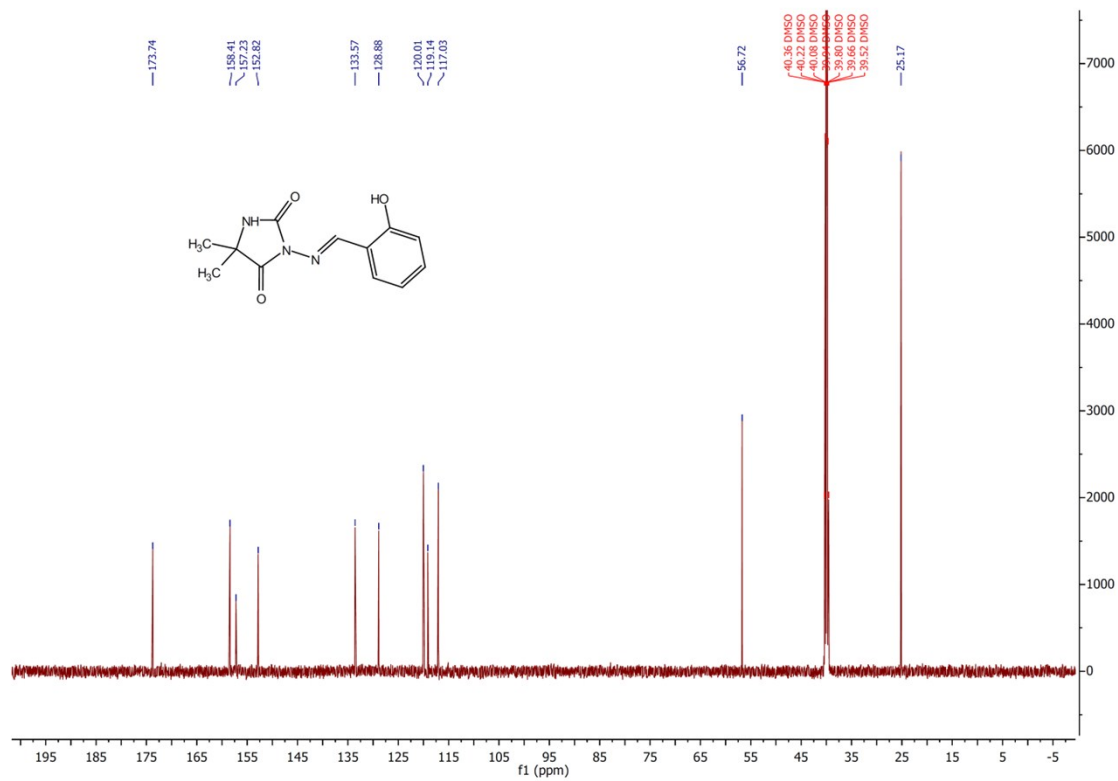

Fig. S10 <sup>13</sup>C NMR spectrum of SB2

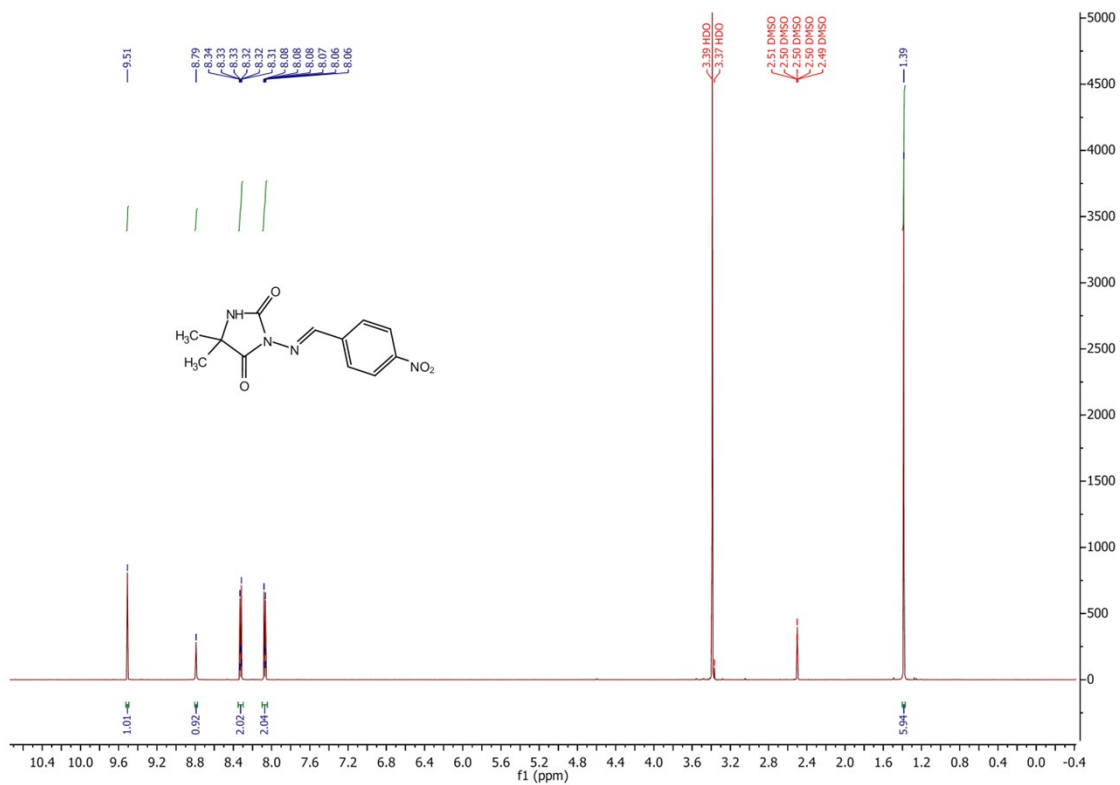

Fig. S11 <sup>1</sup>H NMR spectrum of SB3

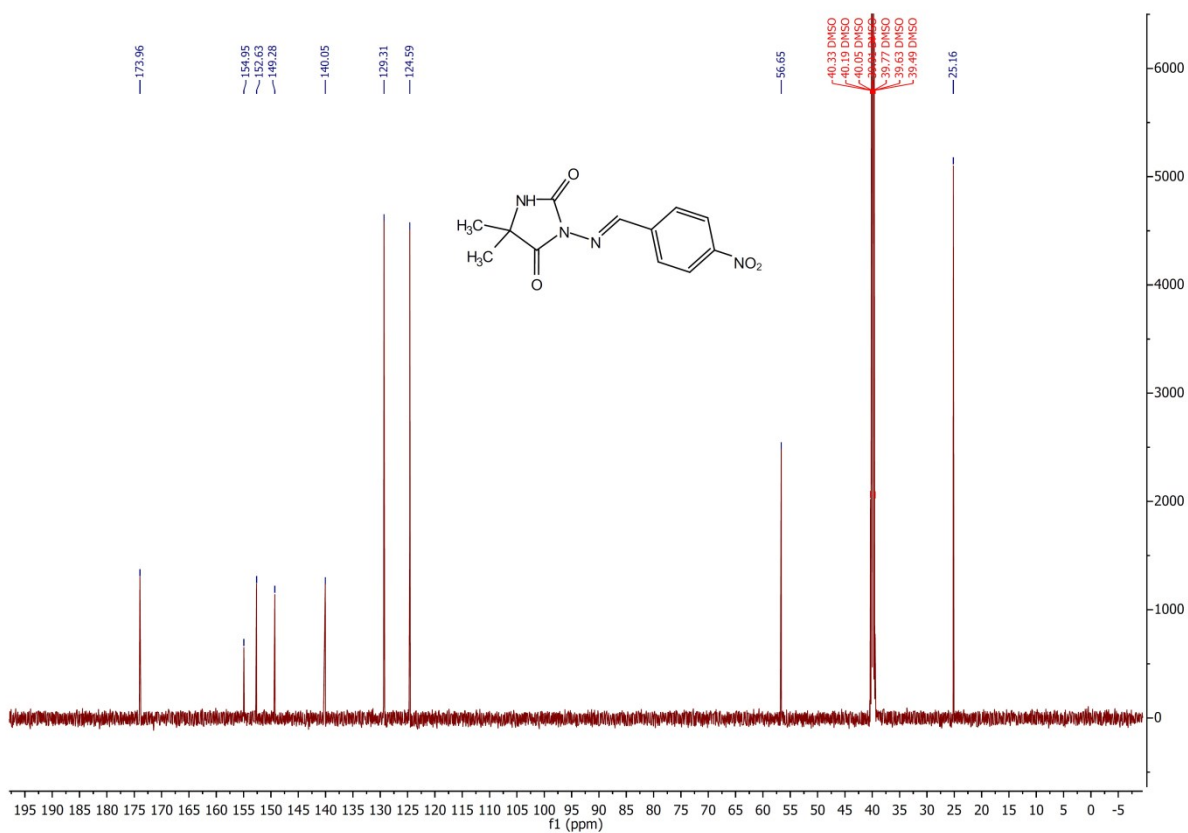

Fig. S12 <sup>13</sup>C NMR spectrum of SB3

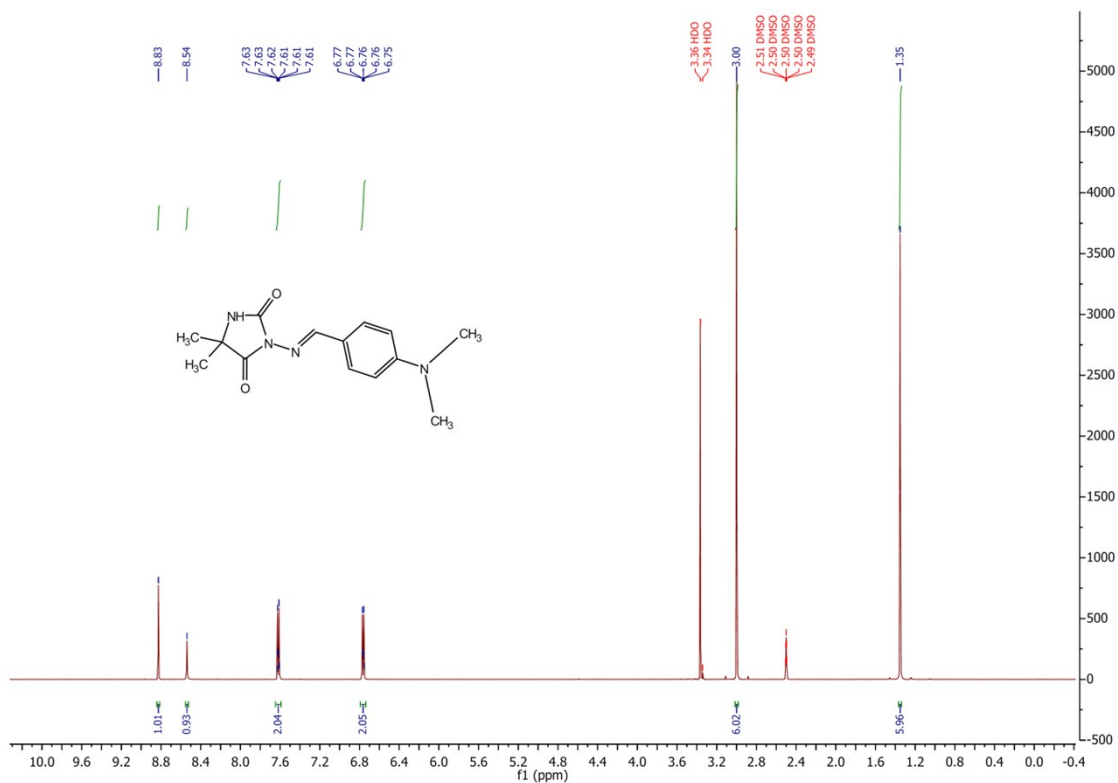

Fig. S13 <sup>1</sup>H NMR spectrum of SB4

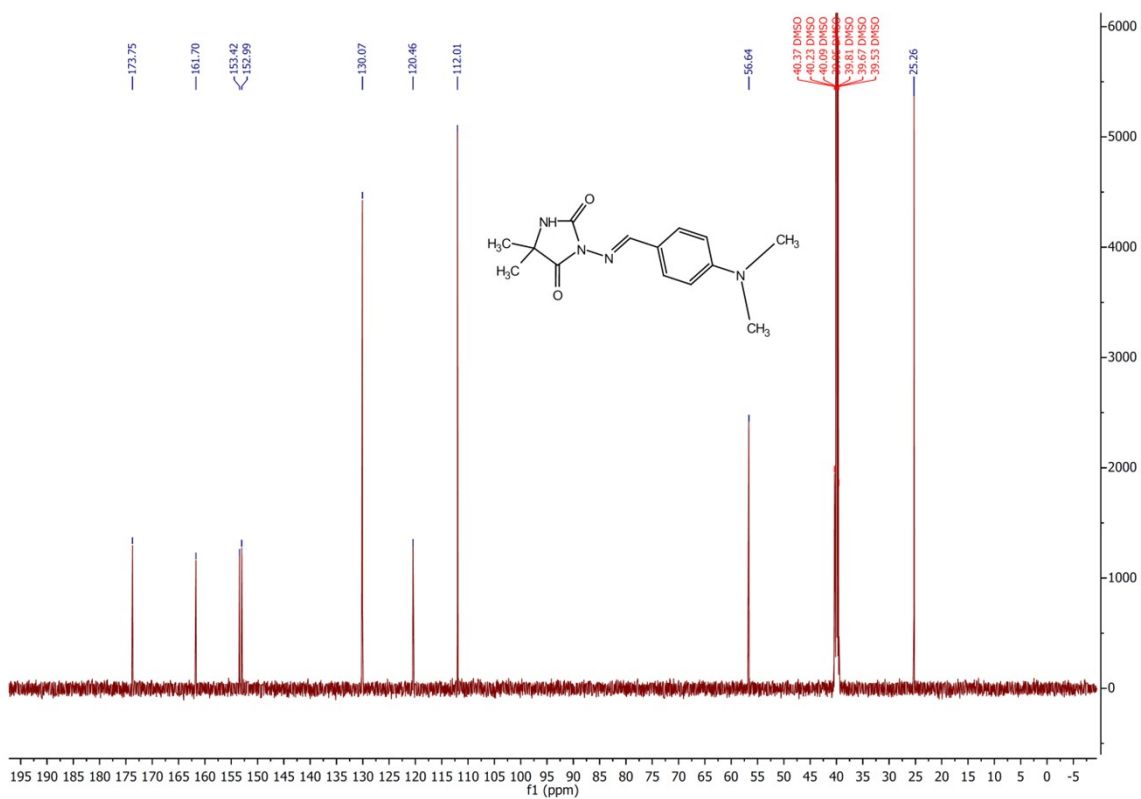

Fig. S14 <sup>13</sup>C NMR spectrum of SB4

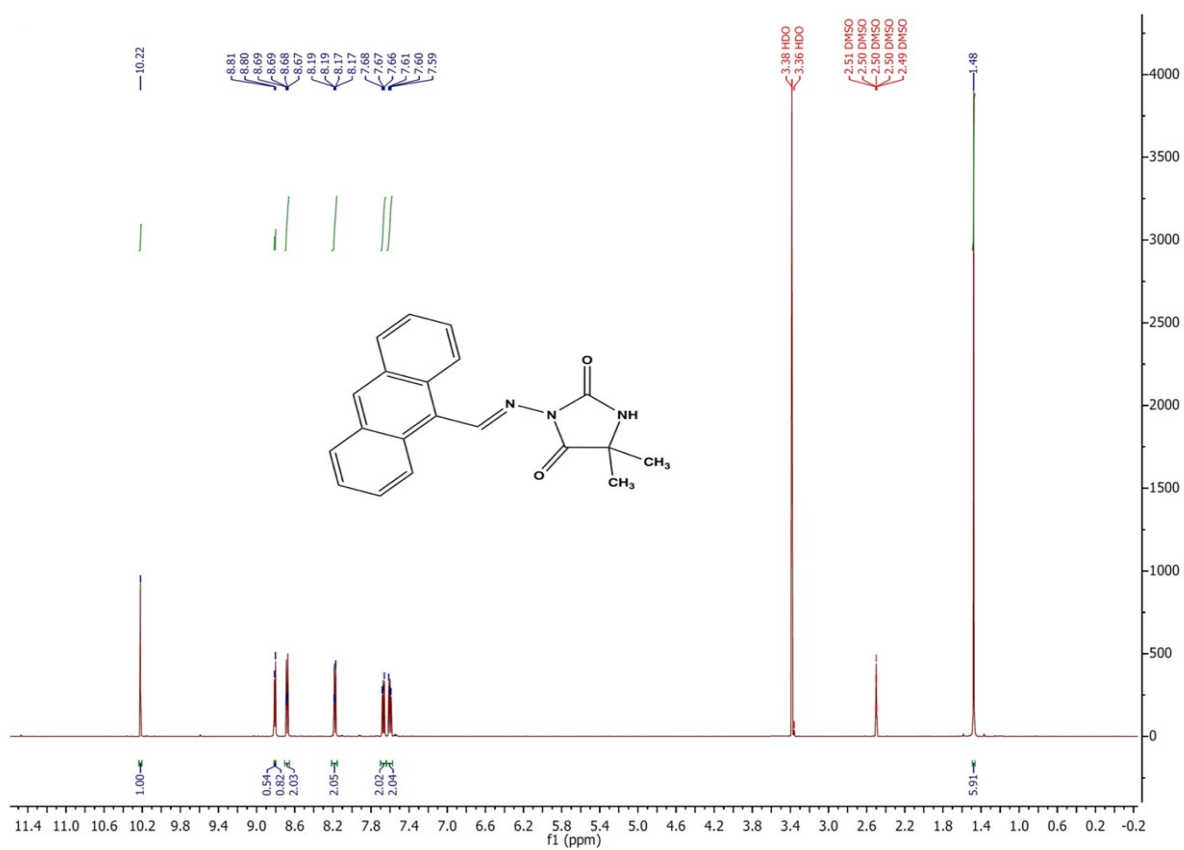

Fig. S15 <sup>1</sup>H NMR spectrum of SB5

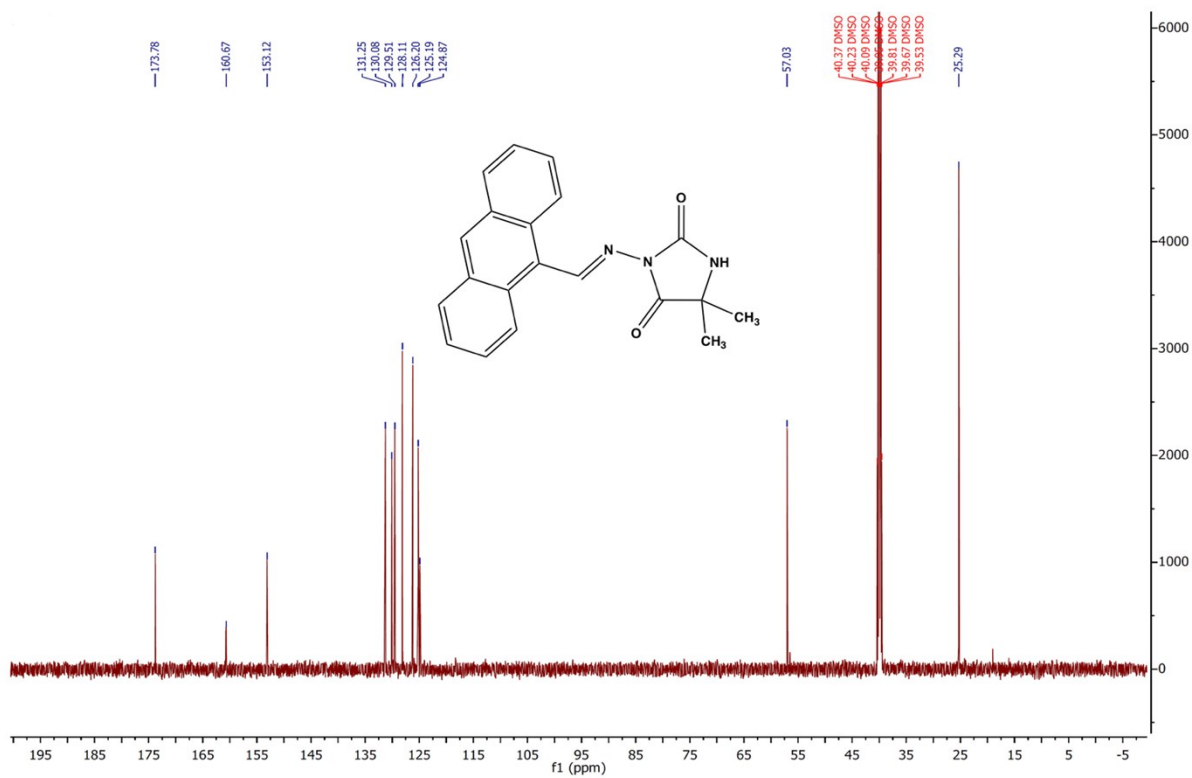

Fig. S16 <sup>13</sup>C NMR spectrum of SB5

## X-ray Diffraction

**Table S1** Bond lengths, angles and torsion angles for compounds **SB1-3** and **SB5**.

| <b>Structure</b>      | S459 – <b>SB1</b> | S453 – <b>SB2</b> | S467 – <b>SB3</b> | S458 – <b>SB5</b> |
|-----------------------|-------------------|-------------------|-------------------|-------------------|
| <b>Bonds</b>          | <b>Å</b>          | <b>Å</b>          |                   | <b>Å</b>          |
| N1—C3                 | 1.4542 (19)       | 1.461 (2)         | 1.470 (3)         | 1.452 (5)         |
| N1—C5                 | 1.3342 (18)       | 1.325 (2)         | 1.332 (3)         | 1.343 (5)         |
| N2—C4                 | 1.3847 (18)       | 1.376 (2)         | 1.383 (3)         | 1.365 (4)         |
| N2—C5                 | 1.4113 (18)       | 1.423 (2)         | 1.424 (3)         | 1.422 (4)         |
| N3—N2                 | 1.3936 (16)       | 1.380 (2)         | 1.389 (3)         | 1.392 (4)         |
| N3—C6                 | 1.278 (2)         | 1.283 (2)         | 1.281 (3)         | 1.263 (4)         |
| O4—C4                 | 1.2029 (19)       | 1.212 (2)         | 1.216 (3)         | 1.217 (4)         |
| O5—C5                 | 1.2184 (17)       | 1.217 (2)         | 1.224 (3)         | 1.198 (4)         |
| O8—C8                 | —                 | 1.350 (2)         | —                 | —                 |
| N4—O1                 | —                 | —                 | 1.225 (3)         | —                 |
| N4—O2                 | —                 | —                 | 1.221 (3)         | —                 |
| S1—C7                 | 1.7166 (17)       | —                 | —                 | —                 |
| S1—C8                 | 1.708 (2)         | —                 | —                 | —                 |
| <b>Angles</b>         | <b>°</b>          | <b>°</b>          |                   | <b>°</b>          |
| N3—N2—C5              | 117.59 (11)       | 117.92 (14)       | 117.89 (19)       | 119.0 (3)         |
| C6—N3—N2              | 116.23 (13)       | 119.56 (15)       | 117.9 (2)         | 115.6 (3)         |
| C4—N2—N3              | 128.87 (12)       | 130.37 (14)       | 130.0 (2)         | 128.4 (3)         |
| O4—C4—N2              | 126.66 (14)       | 126.77 (17)       | 127.0 (3)         | 126.1 (3)         |
| O5—C5—N1              | 129.05 (14)       | 129.70 (17)       | 129.1 (3)         | 129.7 (4)         |
| O5—C5—N2              | 124.00 (13)       | 123.81 (17)       | 124.1 (2)         | 124.8 (3)         |
| O8—C8—C7              | —                 | 122.30 (18)       | —                 | —                 |
| C8—S1—C7              | 90.98 (10)        | —                 | —                 | —                 |
| C6—C7—S1              | 123.05 (12)       | —                 | —                 | —                 |
| O2—N4—O1              | —                 | —                 | 122.5 (2)         | —                 |
| <b>Torsion angles</b> | <b>°</b>          | <b>°</b>          |                   | <b>°</b>          |
| N3—N2—C4—O4           | -12.6 (3)         | -10.4 (3)         | -10.0 (5)         | 8.4 (6)           |
| N3—N2—C5—O5           | 15.6 (2)          | 8.1 (3)           | 8.0 (4)           | -8.9 (5)          |
| C6—C7—C8—O8           | —                 | -1.6 (3)          | —                 | —                 |
| N2—N3—C6—C7           | -175.22 (13)      | -176.37 (15)      | -176.5 (2)        | 177.4 (3)         |
| C8—C7—C6—N3           | —                 | —                 | 0.8 (4)           | 32.6 (5)          |
| C20—C7—C6—N3          | —                 | —                 | —                 | -150.6 (3)        |
| S1—C7—C6—N3           | 0.0 (2)           | —                 | —                 | —                 |
| S1—C7—C10—C9          | -0.5 (2)          | —                 | —                 | —                 |
| O2—N4—C10—C11         | —                 | —                 | -10.2 (4)         | —                 |
| O1—N4—C10—C9          | —                 | —                 | 9.8 (4)           | —                 |

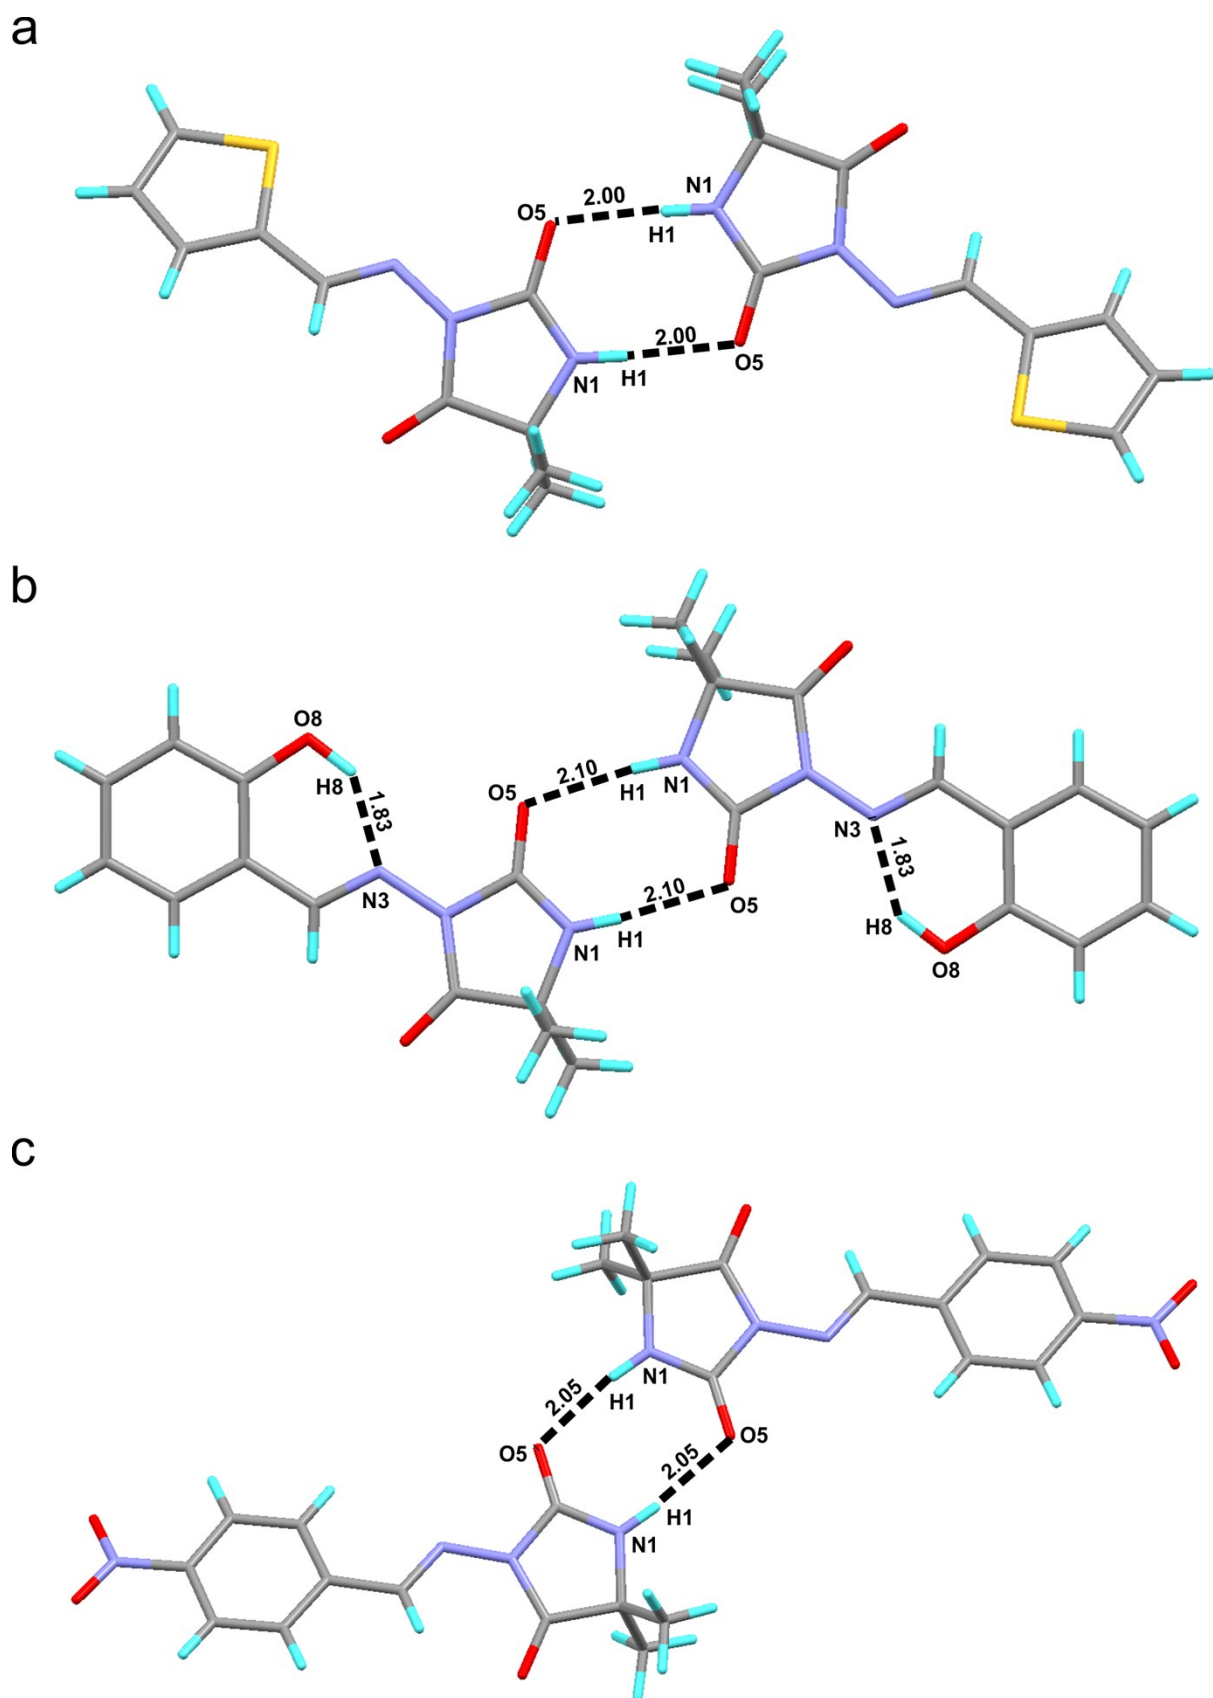

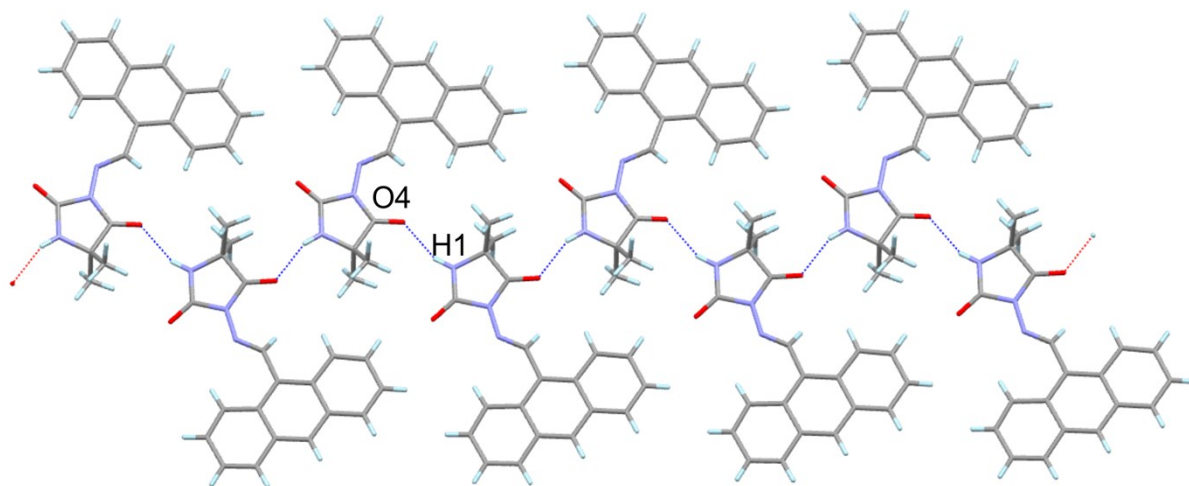

**Fig. SX4** Observed N-H...O interactions in **SB5**.

## Powder diffraction data

### SB2

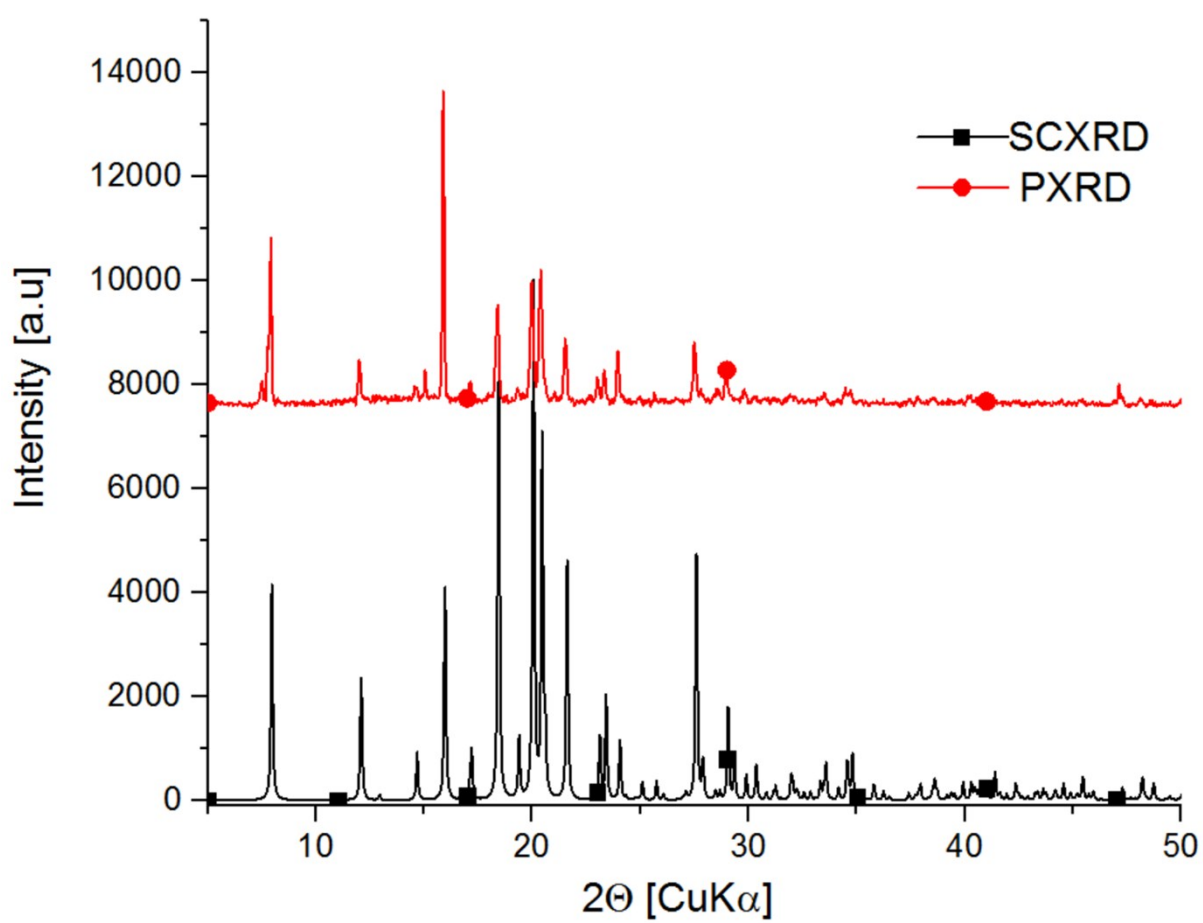



### SB2

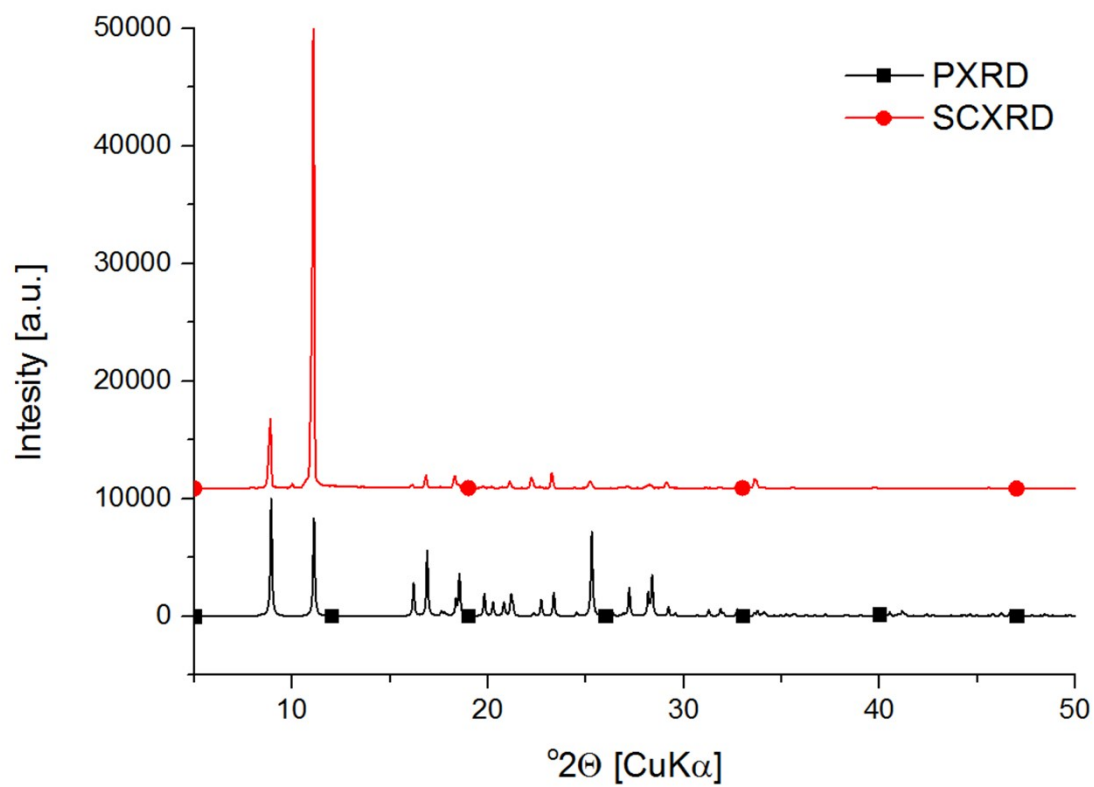

### SB3

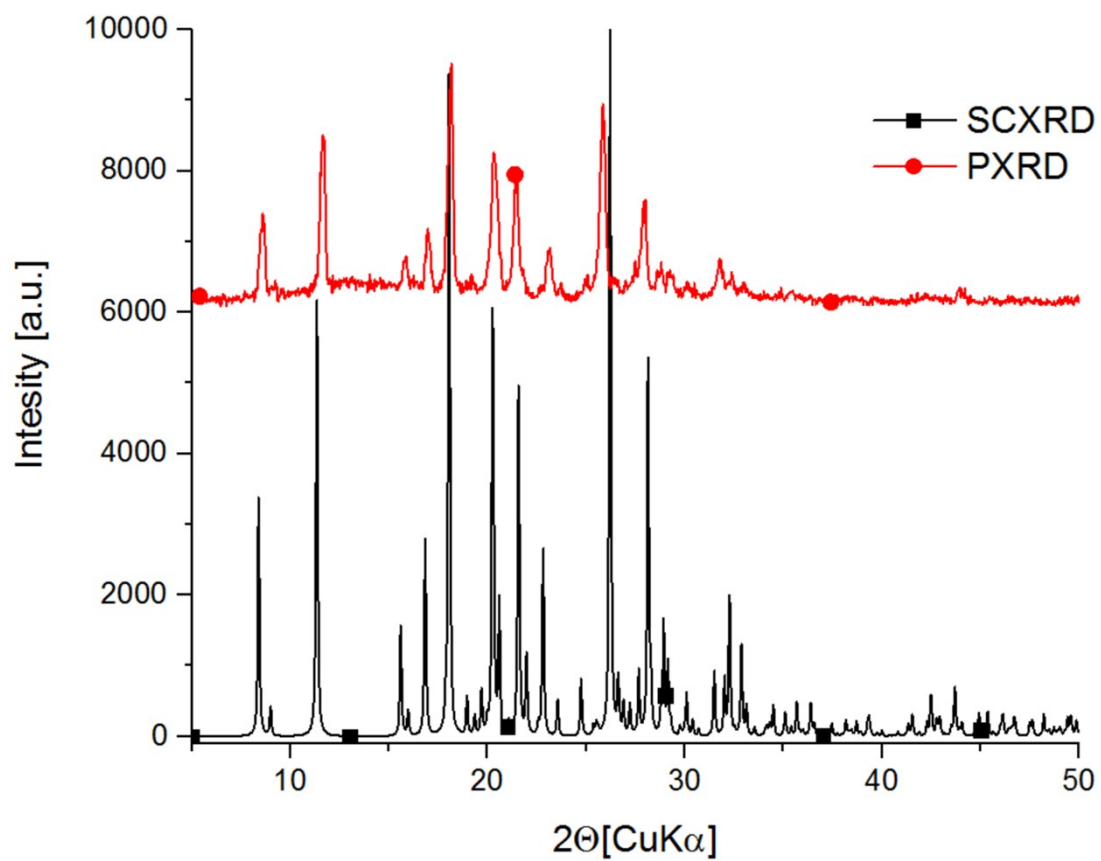

SB5

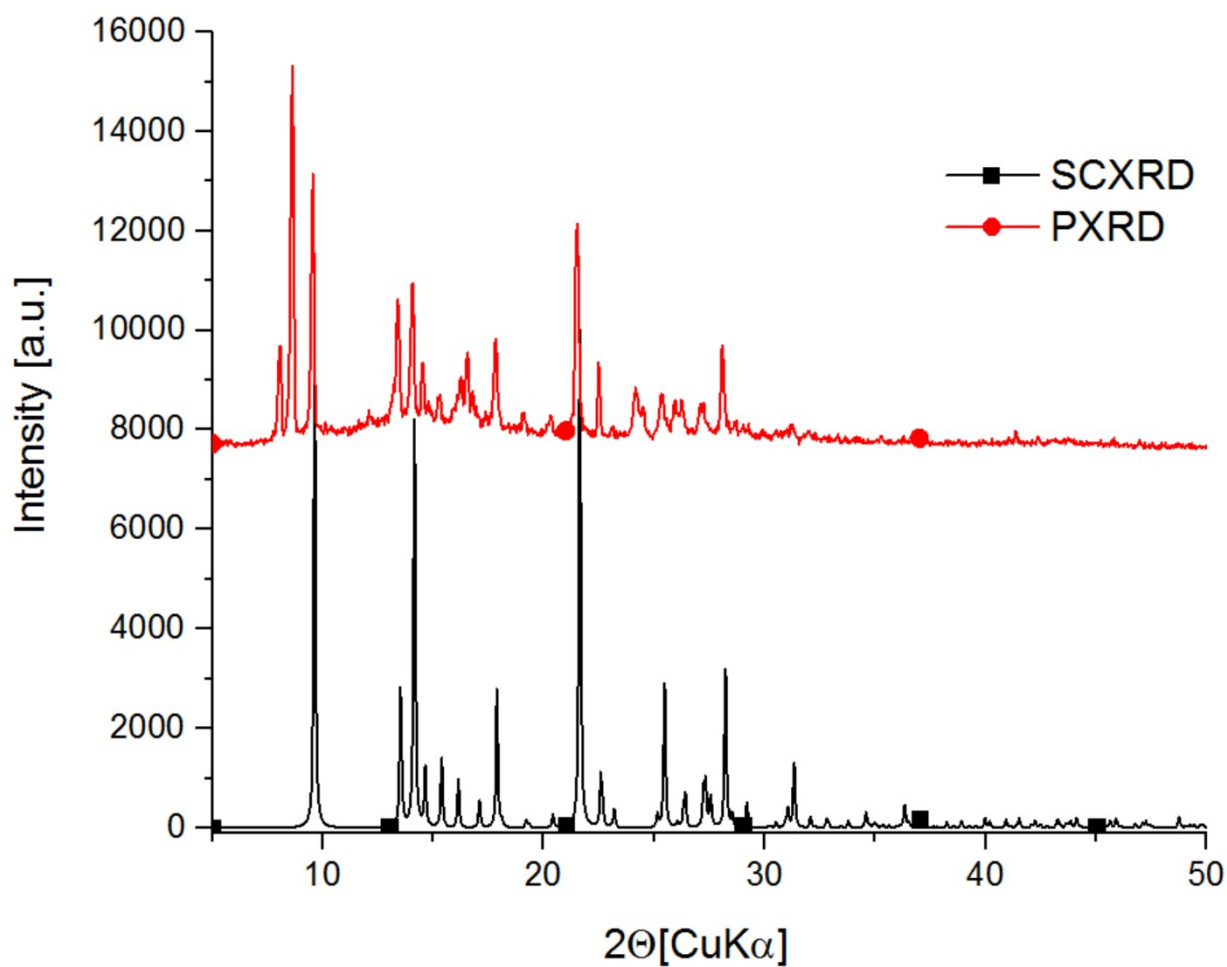

**Fig. SX5** Estimation of the purity of the compounds by comparison of powder diffraction data and those generated from single crystal structure. For SB5 in addition the observed structure crystal of a supposed polymorph is present. Peaks observed in the diffractogram cannot be related those of the starting compounds.
